# Supplementary material for: Who self-medicates? Results from structural equation modeling in the Greater Paris area, France
Source: PubMed Central journal article supplement (PMC6296538; doi:10.1371/journal.pone.0208632), 2018-12-17

### Self-perceived health

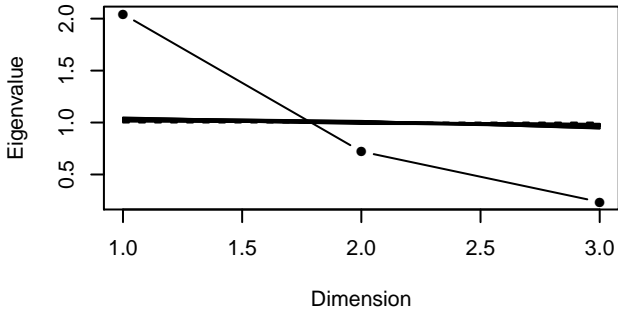

### Daily mobility

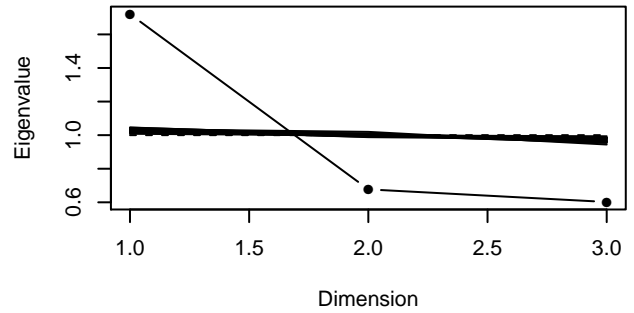

### Health information seeking

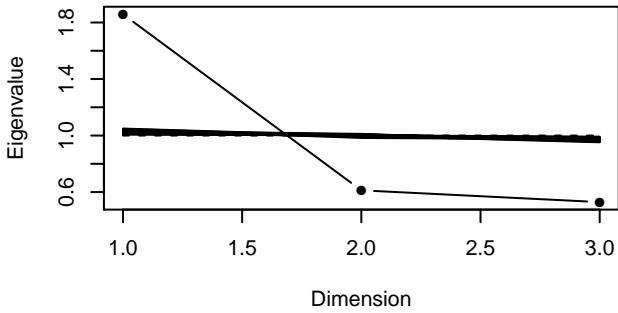

### Chronic disease

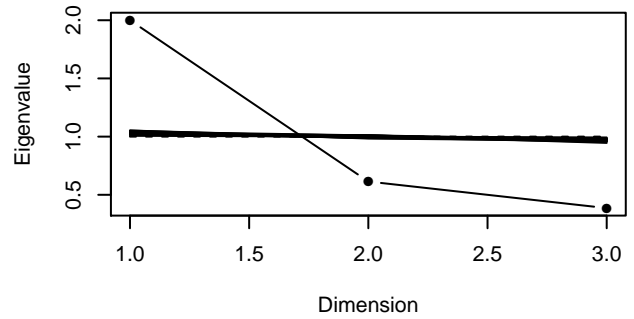

### Self-perceived susceptibility to disease

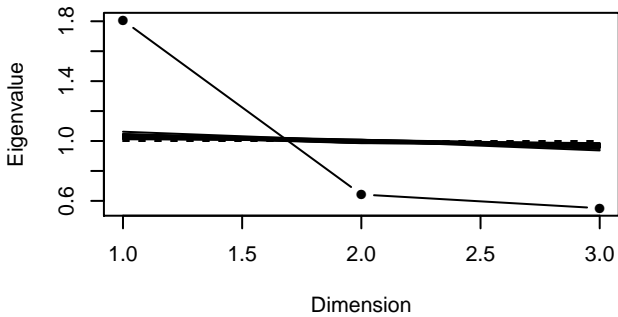

Supplement: pone.0208632.s002.pdf [file pone.0208632.s002.pdf]
