# Supplementary material for: Who self-medicates? Results from structural equation modeling in the Greater Paris area, France
Source: PubMed Central journal article supplement (PMC6296538; doi:10.1371/journal.pone.0208632), 2018-12-17
Supplement: pone.0208632.s004.pdf [file pone.0208632.s004.pdf]

S3 Figure. Path diagram of self-medication in the bottom quartile of household income, n = 707.

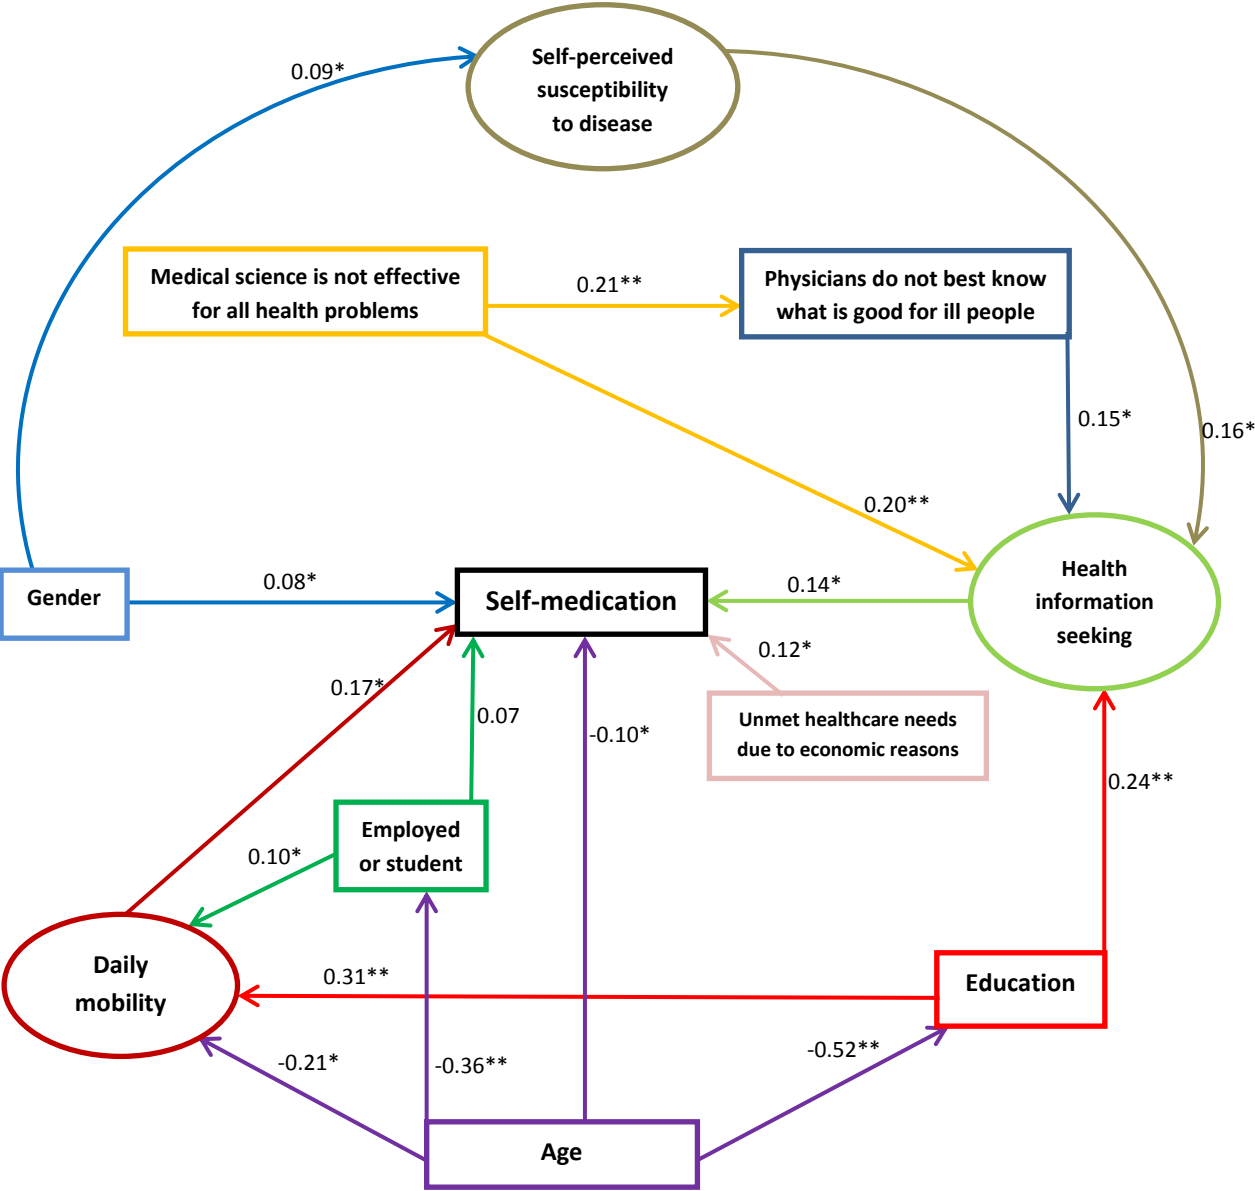

\* : <0.05      \*\* : <0.001

Arrows starting from the same explanatory variable are in the same color. Ellipses: latent variables; boxes: observed variables. All coefficients are standardized. Robsut CFI = 0.882. Robust RMSEA = 0.048
