# Supplementary material for: Who self-medicates? Results from structural equation modeling in the Greater Paris area, France
Source: PubMed Central journal article supplement (PMC6296538; doi:10.1371/journal.pone.0208632), 2018-12-17
Supplement: pone.0208632.s005.pdf [file pone.0208632.s005.pdf]

S4 Figure. Path diagram of self-medication in the top three quartiles of household income, n = 2186

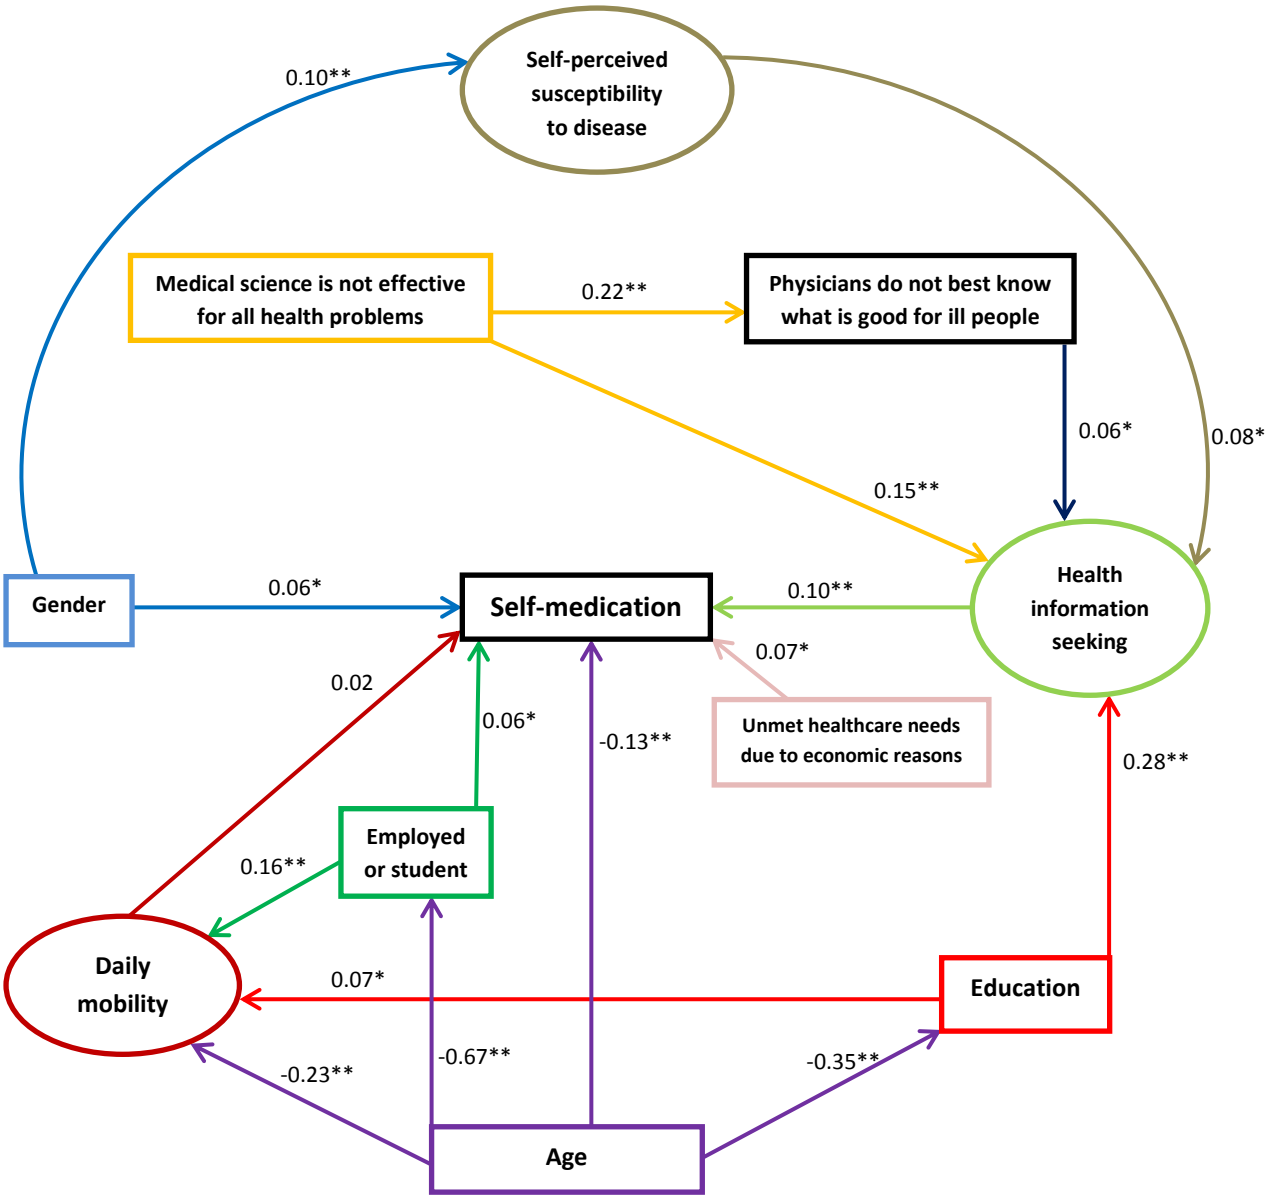

\* : <0.05      \*\* : <0.001

Arrows starting from the same explanatory variable are in the same color. Ellipses: latent variables; boxes: observed variables. All coefficients are standardized. Robust CFI = 0.946. Robust RMSEA = 0.030.
